# Supplementary material for: Simple In Vitro 18O Labeling for Improved Mass Spectrometry-Based Drug Metabolites Identification: Deep Drug Metabolism Study
Source: MDPI journal article supplement (doi:10.3390/ijms24054569), 2023-02-26
Supplement: s1 [file s1]

Supplementary Materials to the manuscript

**“Simple in vitro  $^{18}\text{O}$  labeling for improved mass spectrometry based drug metabolites identification: Deep drug metabolism study” by**

*Boris Tupertsev<sup>1,2</sup>, Sergey Osipenko<sup>3</sup>, Albert Kireev<sup>1</sup>, Eugene Nikolaev<sup>1</sup> and  
Yury Kostyukevich<sup>1\*</sup>*

<sup>1</sup>Center of Molecular and Cellular Biology (CMCB), Skolkovo Institute of Science and Technology, Nobel Str., 3,  
121205 Moscow, Russia;

<sup>2</sup>Moscow Institute of Physics and Technology, Phystech School of Biological and Medical Physics, Institutskiy per., 9,  
Dolgoprudny, Moscow, 141701, Russia;

<sup>3</sup>Center for Computational and Data-Intensive Science and Engineering, Skolkovo Institute of Science and Technology,  
Nobel Str., 3, 121205 Moscow, Russia;

\*Correspondence authors: y.kostyukevich@skoltech.ru

**Preparation of stock solutions**

Stock solutions was prepared in water for Bupivacaine hydrochloride at 10mM and diluted to 10  $\mu\text{M}$  (1:1000 dilution) with 50mM PBS (pH 7.4) in water.

Stock solutions (10 mM) should be stored at  $-20^{\circ}\text{C}$  or  $-80^{\circ}\text{C}$  for 3 months.

**Preparation of microsomal suspension**

Dilute 10  $\mu\text{L}$  of LM suspension (20 mg/mL) with 156.7  $\mu\text{L}$  PBS to final concentration of 1.2 mg/mL.

**Preparation of cofactor mix**

Dissolve 3.6 mg of NADPH in 216  $\mu\text{L}$  of water to prepare 20 mM stock solution.

Dissolve 4.7 mg of  $\text{MgCl}_2$  in 732  $\mu\text{L}$  of water to prepare 66 mM stock solution.

Mix both solutions (1:1) to prepare 10x cofactor mix.

**Experiment**

Bupivacaine was incubated in parallel under two protocols:

A) To 40  $\mu\text{L}$  of LM suspension in PBS (1.2 mg/mL) add 5  $\mu\text{L}$  of 10  $\mu\text{M}$  stock solution, vortex and incubate in shaker at  $37^{\circ}\text{C}$  and 600 rpm. After 5 min add 5  $\mu\text{L}$  of co-factor mix, vortex and incubate 1 hour at  $37^{\circ}\text{C}$  and 600 rpm.

B) 50mM PBS (pH 7.4) in water degassed for 15 min. Solutions of stocks, microsomes and cofactors prepare similarly to the corresponding previous paragraphs. To 40 $\mu\text{L}$  of LM suspension in PBS (1.2 mg/mL) add 5 $\mu\text{L}$  of 10 $\mu\text{M}$  stock solution and incubate in shaker at  $37^{\circ}\text{C}$  pass gaseous oxygen- $^{18}\text{O}_2$  through the resulting solution. After 5 min add 5 $\mu\text{L}$  of co-factor mix and pass  $^{18}\text{O}_2$

through the resulting solution for 3 min. Seal the container and incubate in shaker at 37°C and 600 rpm.

To prepare control sample add 5  $\mu$ L of water instead of co-factor mix/microsomes.

### Data Analysis

Compound Discoverer™ 3.2 program (Thermo Fisher Scientific, Houston, Texas, USA) workflow was MetID w Stats Expected and Unknown w Background Removal (Figure S6). As an expected compound bupivacaine structure was added. All I phase transformation were added for calculating. Mass tolerances of expected and detected compounds were set to 10ppm, RT tolerance 0.1 min. Scan filter setting DDA.

Computational details of ESI-MS/MS bupivacaine metabolites spectra:

Computations consist of two main steps: protonation and fragmentation. The computations were conducted on Ubuntu version 22.04 installed as a virtual machine on top of Windows 10 by VMware Workstation 16 Player with 16 computer cores of dual Intel Xeon E5-2680@v2 2.8 GHz and 124 GB RAM.

Protonation of the molecules was conducted by using the quantum chemistry based Conformer-Rotamer Ensemble Sampling Tool (CREST). The most populated protonated structures were selected by multilevel optimization with automated script CREST version 2.12 using the GFN2-xTB program compatible with xTB version 6.4.0. After crude and loose optimization remaining structures of protomers stand inside user defined 20 kcal/mol energy ranges.

Fragmentation was conducted by QCxMS version V5.2.0, which is a quantum chemical (QC) based program that enables users to calculate mass spectra (MS) using Born-Oppenheimer Molecular Dynamics (MD). It is the successor of the QCEIMS program, in which the EI part is exchanged to x (x=EI, CID) to account for the greater general applicability of the program.[1]. QCxMS runs in three main steps: a) the input structure is equilibrated at 500 K on a 5 ps molecular dynamics trajectory (MD) with a timestep of 0.5 fs, gas pressure was 1 mTorr as default value, b) 300 structural snapshots were taken along MD trajectory for sampling of the conformational space, c) conducting massively parallel calculations with the snapshot structures as starting geometries (production runs). In the production runs collisions between  $[M+H]^+$  and neutral gas Ar atoms with a randomized collision angle are simulated for each product ion run (Comparison of computed spectra revealed better stability

---

<sup>1</sup> (1) Koopman, J.; Grimme, S. From QCEIMS to QCxMS: A Tool to Routinely Calculate CID Mass Spectra Using Molecular Dynamics. *J. Am. Soc. Mass Spectrom.* **2021**, 32 (7), 1735–1751. <https://doi.org/10.1021/jasms.1c00098>.

of computation process and better match with experimental spectra when Ar was used rather than N<sub>2</sub>). If the critical energy E<sub>0</sub> is reached, statistical and non-statistical fragmentation of the molecular ion occurs. To induce sufficient dissociation of [M+H]<sup>+</sup>, the collision process had to be repeated multiple times, number of collisions determined automatically by preinstalled script of QCxMS.

The ESI-MS/MS spectra of the most populated protomers were calculated by using the general activation run-type with a collision cell length of 0.25 m, collision energy of 60 eV, full-auto run-type specifics, and 300 number of trajectories.

Initial structures of bupivacaine metabolites were optimized with molecular mechanics force field MMFF94s (number of steps 5000, steepest descent algorithm, convergence 10e<sup>-7</sup>) by using Avogadro free software, version 1.2.0 with embedded Open Babel version 2.3.90. [<https://avogadro.cc/>.]

Table S1. The results of the analysis of bupivacaine chloride with rat liver microsomes samples incubated in air and in excess of oxygen-18 at the first day of the experiment and after 6 months storage at  $-20^{\circ}\text{C}$ . C.u , are area conventional units obtained by Q Exactive Orbitrap mass spectrometer

| Classes of metabolites | $^{16}\text{O}$ 07.02.2022 |            | $^{18}\text{O}$ 07.02.2022 |            | $^{16}\text{O}/^{18}\text{O}$<br>1d | $^{16}\text{O}$ 08.08.2022 |            | $^{18}\text{O}$ 08.08.2022 |            | $^{16}\text{O}/^{18}\text{O}$<br>6m | $\Delta$ , % |
|------------------------|----------------------------|------------|----------------------------|------------|-------------------------------------|----------------------------|------------|----------------------------|------------|-------------------------------------|--------------|
|                        | RT, min                    | Area, c.u. | RT, min                    | Area, c.u. |                                     | RT, min                    | Area, c.u. | RT, min                    | Area, c.u. |                                     |              |
| H-2                    | 3.99                       | 30297774   | 4.00                       | 1169838    | 26                                  | 4,07                       | 22442796   | 4,08                       | 935870     | 25                                  | 8            |
|                        | 4.84                       | 118878162  | 4.84                       | 8696010    | 14                                  | 4,93                       | 89382077   | 4,92                       | 7012911    | 13                                  | 7            |
| H-3                    | 5.05                       | 181444887  | 5.09                       | 15152132   | 12                                  | 5,13                       | 138507547  | 5,18                       | 12219461   | 11                                  | 6            |
| H-2                    | 5.37                       | 124406748  | 5.37                       | 9805619    | 13                                  | 5,47                       | 95697498   | 5,46                       | 8103817    | 12                                  | 7            |
| H-3                    | 7.51                       | 4820959    | 7.51                       | 83253      | 58                                  | 7,59                       | 3571081    | 7,58                       | 66602      | 54                                  | 8            |
|                        | 7.91                       | 7682714    | 7.91                       | 207130     | 37                                  | 7,99                       | 5733369    | 7,98                       | 167040     | 34                                  | 8            |
| H-1                    | 9.48                       | 134098484  | 9.51                       | 5341168    | 25                                  | 9,56                       | 98601826   | 9,57                       | 4272934    | 25                                  | 9            |
|                        | 10.14                      | 42610907   | 10.15                      | 356390     | 120                                 | 10,23                      | 32777621   | 10,25                      | 294537     | 111                                 | 7            |
|                        | 10.40                      | 37340246   | 10.39                      | 939393     | 40                                  | 10,48                      | 27865855   | 10,48                      | 746735     | 37                                  | 7            |

Table S2. The results of the analysis of two  $1\mu\text{M}$  freshly prepared water solutions of bupivacaine chloride at the first day of the experiment and after 6 months. C.u , are area conventional units obtained by Q Exactive Orbitrap mass spectrometer

| Sample                                    | RT, min | Area, c.u. | $S_r$ , % |
|-------------------------------------------|---------|------------|-----------|
| 1.1 Bupivacaine chloride $1\mu\text{M}$   | 11.32   | 566075744  | 6         |
| 1.2 Bupivacaine chloride $1\mu\text{M}$   | 11.33   | 569114585  |           |
| 1.3 Bupivacaine chloride $1\mu\text{M}$   | 11.32   | 560735491  |           |
| 2.1 Bupivacaine chloride $1\mu\text{M}^*$ | 11.40   | 503482917  |           |
| 2.2 Bupivacaine chloride $1\mu\text{M}^*$ | 11.40   | 512105360  |           |
| 2.3 Bupivacaine chloride $1\mu\text{M}^*$ | 11.39   | 507348574  |           |

\*- freshly prepared solution after 6 months

Table S3. Retention time prediction for bupivacaine metabolites using Skolmix RT predictor

| SMILES metabolite structure                        | Predicted RT, min |
|----------------------------------------------------|-------------------|
| <b>HO-2</b>                                        |                   |
| <chem>Cc1cccc(C)c1NC(=O)C1C(O)CCCN1CCCC=O</chem>   | 11,38             |
| <chem>Cc1cccc(C)c1NC(=O)C1CC(O)CCN1CCCC=O</chem>   | 11,23             |
| <chem>Cc1cccc(C)c1NC(=O)C1CCC(O)CN1CCCC=O</chem>   | 11,54             |
| <chem>Cc1cccc(C)c1NC(=O)C1CCCC(O)N1CCCC=O</chem>   | 11,75             |
| <chem>O=C(Nc1c(C)cccc1C)C1CCCC[N+](O)CCCC=O</chem> | 13,18             |

|                                                      |       |
|------------------------------------------------------|-------|
| <chem>Cc1cccc(C)c1NC(=O)C1C(O)CCCN1CCC(C)=O</chem>   | 10,21 |
| <chem>Cc1cccc(C)c1NC(=O)C1CC(O)CCN1CCC(C)=O</chem>   | 9,82  |
| <chem>Cc1cccc(C)c1NC(=O)C1CCC(O)CN1CCC(C)=O</chem>   | 10,63 |
| <chem>Cc1cccc(C)c1NC(=O)C1CCCC(O)N1CCC(C)=O</chem>   | 10,66 |
| <chem>O=C(Nc1c(C)cccc1C)C1CCCC[N+](O)CCC(C)=O</chem> | 12,80 |
| <chem>O=C(CN1CCCC(O)C1C(=O)Nc1c(C)cccc1C)CC</chem>   | 11,10 |
| <chem>O=C(CN1CCC(O)CC1C(=O)Nc1c(C)cccc1C)CC</chem>   | 10,64 |
| <chem>O=C(CN1CC(O)CCC1C(=O)Nc1c(C)cccc1C)CC</chem>   | 11,09 |
| <chem>O=C(CN1C(CCCC1O)C(=O)Nc1c(C)cccc1C)CC</chem>   | 11,42 |
| <chem>O=C(Nc1c(C)cccc1C)C1CCCC[N+](O)CC(=O)CC</chem> | 12,97 |
| <chem>OC1CCCN(C(=O)CCC)C1C(=O)Nc1c(C)cccc1C</chem>   | 12,49 |
| <chem>OC1CC(C(=O)Nc2c(C)cccc2C)N(CC1)C(=O)CCC</chem> | 11,27 |
| <chem>OC1CCC(C(=O)Nc2c(C)cccc2C)N(C1)C(=O)CCC</chem> | 12,52 |
| <chem>OC1CCCC(C(=O)Nc2c(C)cccc2C)N1C(=O)CCC</chem>   | 12,10 |
| <chem>O=C(Nc1c(C)cccc1C)C1CCCC[N+](O)C(=O)CCC</chem> | 11,55 |
| <b>HO-3</b>                                          |       |
| <chem>O=C1CCCN(C(O)CCC)C1C(=O)Nc1c(C)cccc1C</chem>   | 13,26 |
| <chem>O=C1CC(C(=O)Nc2c(C)cccc2C)N(CC1)C(O)CCC</chem> | 11,83 |
| <chem>O=C1CCC(C(=O)Nc2c(C)cccc2C)N(C1)C(O)CCC</chem> | 12,96 |
| <chem>OC(CCC)N1C(=O)CCCC1C(=O)Nc1c(C)cccc1C</chem>   | 11,83 |
| <chem>OC(CN1CCCC(=O)C1C(=O)Nc1c(C)cccc1C)CC</chem>   | 11,04 |
| <chem>OC(CN1CCC(=O)CC1C(=O)Nc1c(C)cccc1C)CC</chem>   | 11,12 |
| <chem>OC(CN1CC(=O)CCC1C(=O)Nc1c(C)cccc1C)CC</chem>   | 10,95 |
| <chem>OC(CN1C(=O)CCCC1C(=O)Nc1c(C)cccc1C)CC</chem>   | 10,46 |
| <chem>Cc1cccc(C)c1NC(=O)C1C(=O)CCCN1CCC(C)O</chem>   | 11,94 |
| <chem>Cc1cccc(C)c1NC(=O)C1CC(=O)CCN1CCC(C)O</chem>   | 10,99 |
| <chem>Cc1cccc(C)c1NC(=O)C1CCC(=O)CN1CCC(C)O</chem>   | 10,87 |
| <chem>Cc1cccc(C)c1NC(=O)C1CCCC(=O)N1CCC(C)O</chem>   | 11,53 |
| <chem>Cc1cccc(C)c1NC(=O)C1C(=O)CCCN1CCCCO</chem>     | 10,28 |
| <chem>Cc1cccc(C)c1NC(=O)C1CC(=O)CCN1CCCCO</chem>     | 9,08  |
| <chem>Cc1cccc(C)c1NC(=O)C1CCC(=O)CN1CCCCO</chem>     | 9,65  |
| <chem>Cc1cccc(C)c1NC(=O)C1CCCC(=O)N1CCCCO</chem>     | 8,96  |
| <chem>O=C(Nc1c(C)cccc1C)C1C(=O)CCC[N+](O)CCCC</chem> | 14,49 |
| <chem>O=C(Nc1c(C)cccc1C)C1CC(=O)CC[N+](O)CCCC</chem> | 14,46 |
| <chem>O=C(Nc1c(C)cccc1C)C1CCC(=O)C[N+](O)CCCC</chem> | 16,06 |
| <chem>O=C1CCCC(C(=O)Nc2c(C)cccc2C)[N+](O)CCCC</chem> | 13,87 |
| <b>HO-4</b>                                          |       |
| <chem>Cc1cccc(C)c1NC(=O)C1CCCCN1CCCC(=O)O</chem>     | 9,76  |
| <b>HO-5</b>                                          |       |
| <chem>O=C(CCC)N1CCCCC1C(=O)Nc1c(C)cccc1CO</chem>     | 11,89 |
| <chem>O=C(CCC)N1CCCCC1C(=O)Nc1c(C)ccc(O)c1C</chem>   | 13,43 |
| <chem>O=C(CCC)N1CCCCC1C(=O)Nc1c(C)cc(O)cc1C</chem>   | 12,18 |
| <chem>O=C(CN1CCCCC1C(=O)Nc1c(C)cccc1CO)CC</chem>     | 10,57 |

|                                                    |       |
|----------------------------------------------------|-------|
| <chem>O=C(CN1CCCCC1C(=O)Nc1c(C)ccc(O)c1C)CC</chem> | 11,91 |
| <chem>O=C(CN1CCCCC1C(=O)Nc1c(C)cc(O)cc1C)CC</chem> | 10,41 |
| <chem>Cc1cccc(CO)c1NC(=O)C1CCCCN1CCC(C)=O</chem>   | 9,38  |
| <chem>Cc1ccc(O)c(C)c1NC(=O)C1CCCCN1CCC(C)=O</chem> | 12,09 |
| <chem>Cc1cc(O)cc(C)c1NC(=O)C1CCCCN1CCC(C)=O</chem> | 10,59 |
| <chem>Cc1cccc(CO)c1NC(=O)C1CCCCN1CCCC=O</chem>     | 10,69 |
| <chem>Cc1ccc(O)c(C)c1NC(=O)C1CCCCN1CCCC=O</chem>   | 13,31 |
| <chem>Cc1cc(O)cc(C)c1NC(=O)C1CCCCN1CCCC=O</chem>   | 11,82 |
| <b>H-1</b>                                         |       |
| <chem>Cc1cccc(C)c1NC(=O)C1CCCC(O)N1CCCC</chem>     | 13,26 |
| <chem>Cc1cccc(C)c1NC(=O)C1CCC(O)CN1CCCC</chem>     | 13,57 |
| <chem>Cc1cccc(C)c1NC(=O)C1CC(O)CCN1CCCC</chem>     | 8,51  |
| <chem>Cc1cccc(C)c1NC(=O)C1C(O)CCCN1CCCC</chem>     | 12,37 |
| <chem>O=C(Nc1c(C)cccc1C)C1CCCC[N+](O)CCCC</chem>   | 15,19 |
| <b>H-2</b>                                         |       |
| <chem>Cc1cccc(CO)c1NC(=O)C1CCCCN1CCCC</chem>       | 12,08 |
| <chem>Cc1ccc(O)c(C)c1NC(=O)C1CCCCN1CCCC</chem>     | 14,72 |
| <chem>Cc1cc(O)cc(C)c1NC(=O)C1CCCCN1CCCC</chem>     | 13,01 |
| <b>H-3</b>                                         |       |
| <chem>OC(CCC)N1CCCCC1C(=O)Nc1c(C)cccc1C</chem>     | 12,37 |
| <chem>OC(CN1CCCCC1C(=O)Nc1c(C)cccc1C)CC</chem>     | 10,93 |
| <chem>Cc1cccc(C)c1NC(=O)C1CCCCN1CCC(C)O</chem>     | 11,11 |
| <chem>Cc1cccc(C)c1NC(=O)C1CCCCN1CCCCO</chem>       | 9,54  |
| <b>O-2</b>                                         |       |
| <chem>Cc1cccc(C)c1NC(=O)C1CCCCN1CCCC=O</chem>      | 11,67 |
| <chem>Cc1cccc(C)c1NC(=O)C1CCCCN1CCC(C)=O</chem>    | 10,34 |
| <chem>O=C(CN1CCCCC1C(=O)Nc1c(C)cccc1C)CC</chem>    | 11,53 |
| <chem>O=C(CCC)N1CCCCC1C(=O)Nc1c(C)cccc1C</chem>    | 12,73 |
| <b>O-3</b>                                         |       |
| <chem>Cc1cccc(C=O)c1NC(=O)C1CCCCN1CCCC</chem>      | 13,54 |
| <b>DAH-1</b>                                       |       |
| <chem>O=C(Nc1c(C)cccc1C)C1CCCC(O)N1</chem>         | 10,15 |
| <chem>O=C(Nc1c(C)cccc1C)C1CCC(O)CN1</chem>         | 10,61 |
| <chem>O=C(Nc1c(C)cccc1C)C1CC(O)CCN1</chem>         | 9,64  |
| <chem>O=C(Nc1c(C)cccc1C)C1NCCCC1O</chem>           | 9,60  |
| <chem>O=C(Nc1c(C)cccc1C)C1CCCCN1O</chem>           | 12,28 |
| <b>DAH-2</b>                                       |       |
| <chem>O=C(Nc1c(C)cccc1CO)C1CCCCN1</chem>           | 10,51 |
| <chem>O=C(Nc1c(C)ccc(O)c1C)C1CCCCN1</chem>         | 11,78 |
| <chem>O=C(Nc1c(C)cc(O)cc1C)C1CCCCN1</chem>         | 10,59 |
| <b>DH-1</b>                                        |       |
| <chem>Cc1cccc(CO)c1NC(=O)C1C(O)CCCN1CCCC</chem>    | 12,13 |
| <chem>Cc1ccc(O)c(C)c1NC(=O)C1C(O)CCCN1CCCC</chem>  | 13,09 |

|                                                     |       |
|-----------------------------------------------------|-------|
| <chem>Cc1cc(O)cc(C)c1NC(=O)C1C(O)CCCN1CCCC</chem>   | 11,62 |
| <chem>Cc1cccc(CO)c1NC(=O)C1CC(O)CCN1CCCC</chem>     | 9,63  |
| <chem>Cc1ccc(O)c(C)c1NC(=O)C1CC(O)CCN1CCCC</chem>   | 10,54 |
| <chem>Cc1cc(O)cc(C)c1NC(=O)C1CC(O)CCN1CCCC</chem>   | 9,09  |
| <chem>Cc1cccc(CO)c1NC(=O)C1CCC(O)CN1CCCC</chem>     | 13,17 |
| <chem>Cc1ccc(O)c(C)c1NC(=O)C1CCC(O)CN1CCCC</chem>   | 14,23 |
| <chem>Cc1cc(O)cc(C)c1NC(=O)C1CCC(O)CN1CCCC</chem>   | 12,37 |
| <chem>Cc1cccc(CO)c1NC(=O)C1CCCC(O)N1CCCC</chem>     | 12,86 |
| <chem>Cc1ccc(O)c(C)c1NC(=O)C1CCCC(O)N1CCCC</chem>   | 14,64 |
| <chem>Cc1cc(O)cc(C)c1NC(=O)C1CCCC(O)N1CCCC</chem>   | 13,17 |
| <chem>O=C(Nc1c(C)cccc1CO)C1CCCC[N+](O)CCCC</chem>   | 14,95 |
| <chem>O=C(Nc1c(C)ccc(O)c1C)C1CCCC[N+](O)CCCC</chem> | 16,35 |
| <chem>O=C(Nc1c(C)cc(O)cc1C)C1CCCC[N+](O)CCCC</chem> | 15,13 |
| <b>DH-2</b>                                         |       |
| <chem>O=C(Nc1c(C)cccc1C)C1C(O)CCC[N+](O)CCCC</chem> | 14,18 |
| <chem>OC1CCCN(C(O)CCC)C1C(=O)Nc1c(C)cccc1C</chem>   | 12,18 |
| <chem>OC(CN1CCCC(O)C1C(=O)Nc1c(C)cccc1C)CC</chem>   | 10,61 |
| <chem>Cc1cccc(C)c1NC(=O)C1C(O)CCCN1CCC(C)O</chem>   | 11,59 |
| <chem>Cc1cccc(C)c1NC(=O)C1C(O)CCCN1CCCCO</chem>     | 10,44 |
| <chem>O=C(Nc1c(C)cccc1C)C1CC(O)CC[N+](O)CCCC</chem> | 14,22 |
| <chem>OC1CC(C(=O)Nc2c(C)cccc2C)N(CC1)C(O)CCC</chem> | 11,55 |
| <chem>OC(CN1CCC(O)CC1C(=O)Nc1c(C)cccc1C)CC</chem>   | 11,79 |
| <chem>Cc1cccc(C)c1NC(=O)C1CC(O)CCN1CCC(C)O</chem>   | 11,62 |
| <chem>Cc1cccc(C)c1NC(=O)C1CC(O)CCN1CCCCO</chem>     | 9,52  |
| <chem>O=C(Nc1c(C)cccc1C)C1CCC(O)C[N+](O)CCCC</chem> | 14,92 |
| <chem>OC1CCC(C(=O)Nc2c(C)cccc2C)N(C1)C(O)CCC</chem> | 12,05 |
| <chem>OC(CN1CC(O)CCC1C(=O)Nc1c(C)cccc1C)CC</chem>   | 10,93 |
| <chem>Cc1cccc(C)c1NC(=O)C1CCC(O)CN1CCC(C)O</chem>   | 11,74 |
| <chem>Cc1cccc(C)c1NC(=O)C1CCC(O)CN1CCCCO</chem>     | 9,82  |
| <chem>O=C(Nc1c(C)cccc1C)C1CCCC(O)[N+](O)CCCC</chem> | 14,90 |
| <chem>OC1CCCC(C(=O)Nc2c(C)cccc2C)N1C(O)CCC</chem>   | 11,61 |
| <chem>OC(CN1C(CCCC1O)C(=O)Nc1c(C)cccc1C)CC</chem>   | 10,72 |
| <chem>Cc1cccc(C)c1NC(=O)C1CCCC(O)N1CCC(C)O</chem>   | 9,92  |
| <chem>Cc1cccc(C)c1NC(=O)C1CCCC(O)N1CCCCO</chem>     | 10,18 |
| <chem>O=C(Nc1c(C)cccc1C)C1CCCC[N+](O)C(O)CCC</chem> | 12,03 |
| <chem>O=C(Nc1c(C)cccc1C)C1CCCC[N+](O)CC(O)CC</chem> | 13,01 |
| <chem>O=C(Nc1c(C)cccc1C)C1CCCC[N+](O)CCC(C)O</chem> | 13,03 |
| <chem>O=C(Nc1c(C)cccc1C)C1CCCC[N+](O)CCCCO</chem>   | 11,56 |
| <b>DH-3</b>                                         |       |
| <chem>O=C(Nc1c(C)cccc1CO)C1CCCC[N+](O)CCCC</chem>   | 14,95 |
| <chem>OC(CCC)N1CCCCC1C(=O)Nc1c(C)cccc1CO</chem>     | 11,94 |
| <chem>OC(CN1CCCCC1C(=O)Nc1c(C)cccc1CO)CC</chem>     | 11,01 |
| <chem>Cc1cccc(CO)c1NC(=O)C1C(O)CCCN1CCC(C)O</chem>  | 11,18 |

|                                                      |       |
|------------------------------------------------------|-------|
| <chem>Cc1cccc(CO)c1NC(=O)C1C(O)CCCN1CCCCO</chem>     | 10,87 |
| <chem>O=C(Nc1c(C)ccc(O)c1C)C1CCCC[N+]1(O)CCCC</chem> | 16,35 |
| <chem>OC(CCC)N1CCCCC1C(=O)Nc1c(C)ccc(O)c1C</chem>    | 13,33 |
| <chem>OC(CN1CCCCC1C(=O)Nc1c(C)ccc(O)c1C)CC</chem>    | 12,00 |
| <chem>Cc1ccc(O)c(C)c1NC(=O)C1C(O)CCCN1CCC(C)O</chem> | 12,24 |
| <chem>Cc1ccc(O)c(C)c1NC(=O)C1C(O)CCCN1CCCCO</chem>   | 11,09 |
| <chem>O=C(Nc1c(C)cc(O)cc1C)C1CCCC[N+]1(O)CCCC</chem> | 15,13 |
| <chem>OC(CCC)N1CCCCC1C(=O)Nc1c(C)cc(O)cc1C</chem>    | 12,09 |
| <chem>OC(CN1CCCCC1C(=O)Nc1c(C)cc(O)cc1C)CC</chem>    | 10,46 |
| <chem>Cc1cc(O)cc(C)c1NC(=O)C1C(O)CCCN1CCC(C)O</chem> | 10,89 |
| <chem>Cc1cc(O)cc(C)c1NC(=O)C1C(O)CCCN1CCCCO</chem>   | 9,84  |
| <b>DAO</b>                                           |       |
| <chem>O=C1CCCC(N1)C(=O)Nc1c(C)cccc1C</chem>          | 11,49 |
| <chem>O=C(Nc1c(C)cccc1C)C1CCC(=O)CN1</chem>          | 12,35 |
| <chem>O=C(Nc1c(C)cccc1C)C1CC(=O)CCN1</chem>          | 10,60 |
| <chem>O=C(Nc1c(C)cccc1C)C1NCCCC1=O</chem>            | 9,96  |



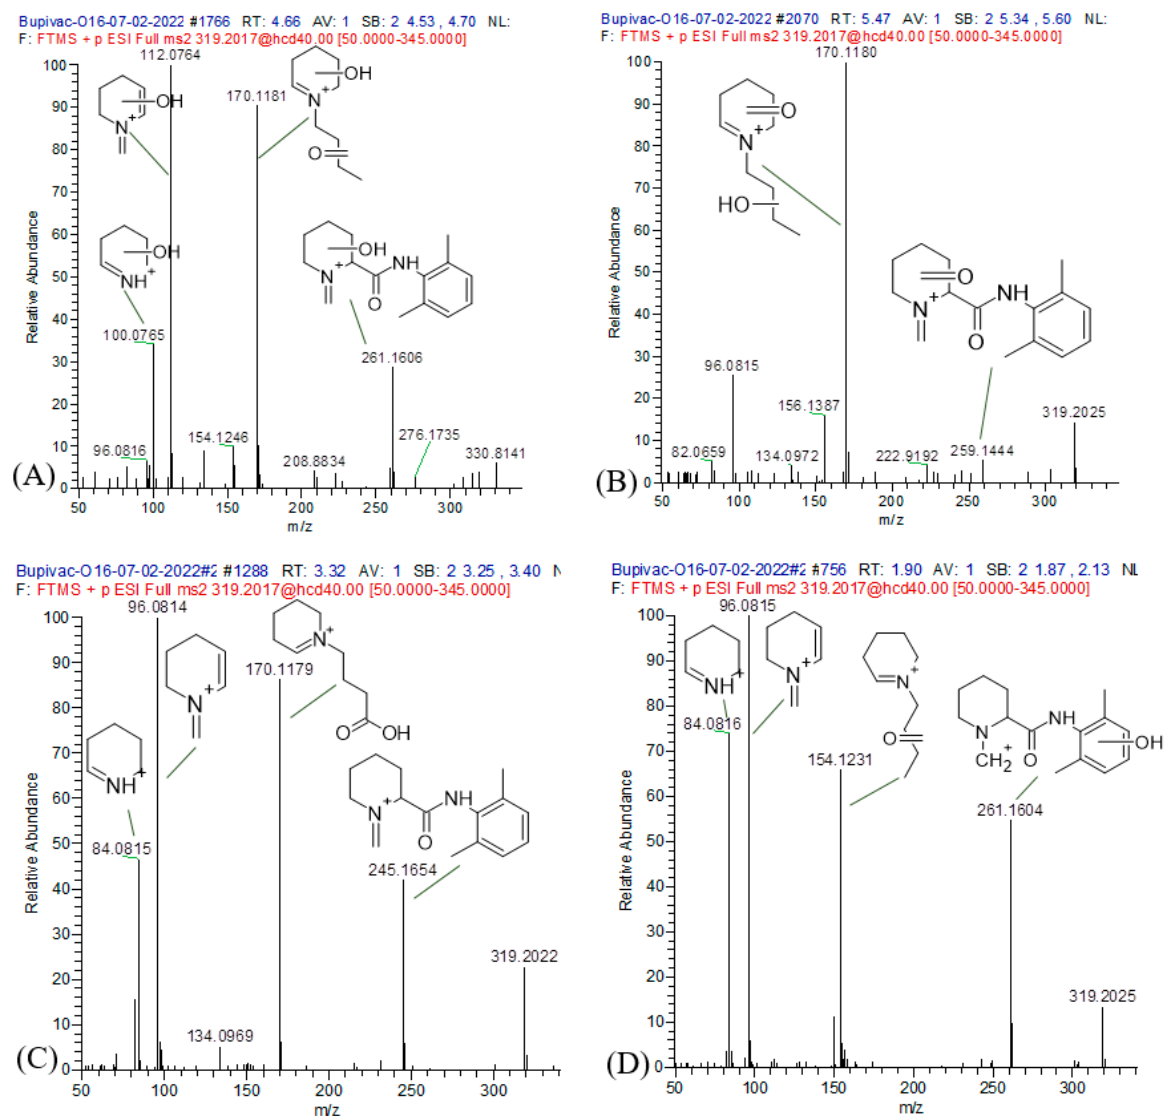

Figure S1. MS/MS spectra of unreported metabolites (A) HO-2 with RT 4.66 min, (B) HO-3 with RT 5.47, (C) known HO-4 with terminal carboxylic group RT 3.30 min and (D) HO-5 with RT 1.90 min. The presented spectra without oxygen-18 isotope labels in positive-ion electrospray ionization mode

Bupivac-O16-07-02-2022#2 #538 RT: 1.32 AV: 1 SB: 2 1.21, 1.43 NL:  
F: FTMS + p ESI Full ms2 249.1598@hcd40.00 [50.0000-275.0000]

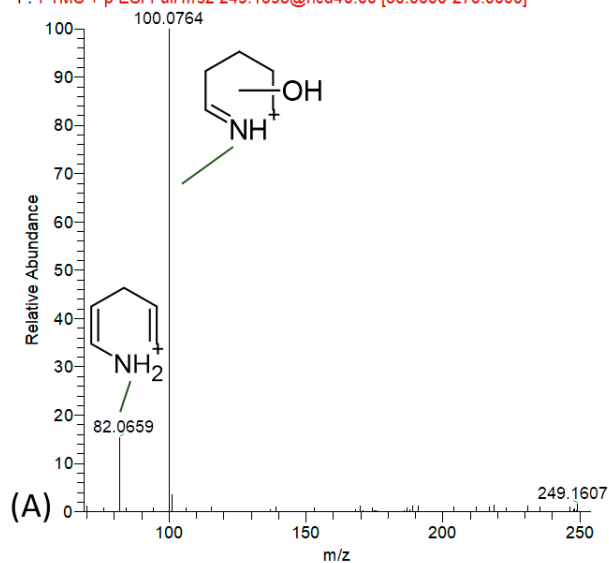

Bupivac-O16-07-02-2022#2 #426 RT: 1.02 AV: 1 SB: 2 0.91, 1.13 NL:  
F: FTMS + p ESI Full ms2 249.1598@hcd40.00 [50.0000-275.0000]

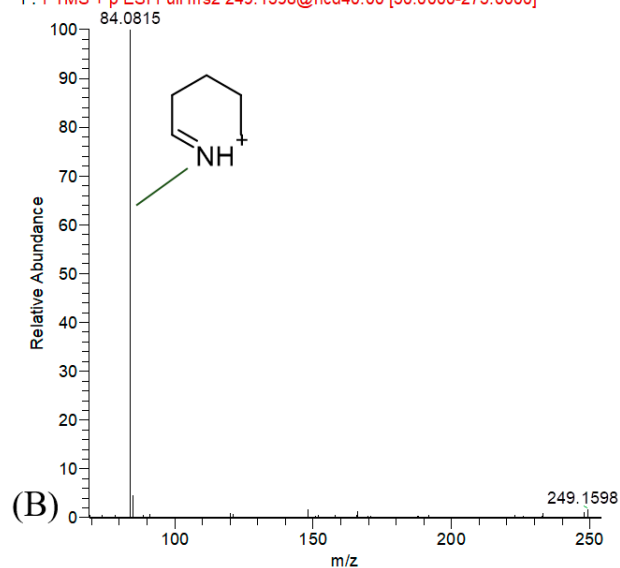

Figure S2. MS/MS spectra of unreported metabolites (A) DAH-1 with RT 1.32 min, (B) DAH-2 with RT 1.02. The presented spectra without oxygen-18 isotope labels in positive-ion electrospray ionization mode

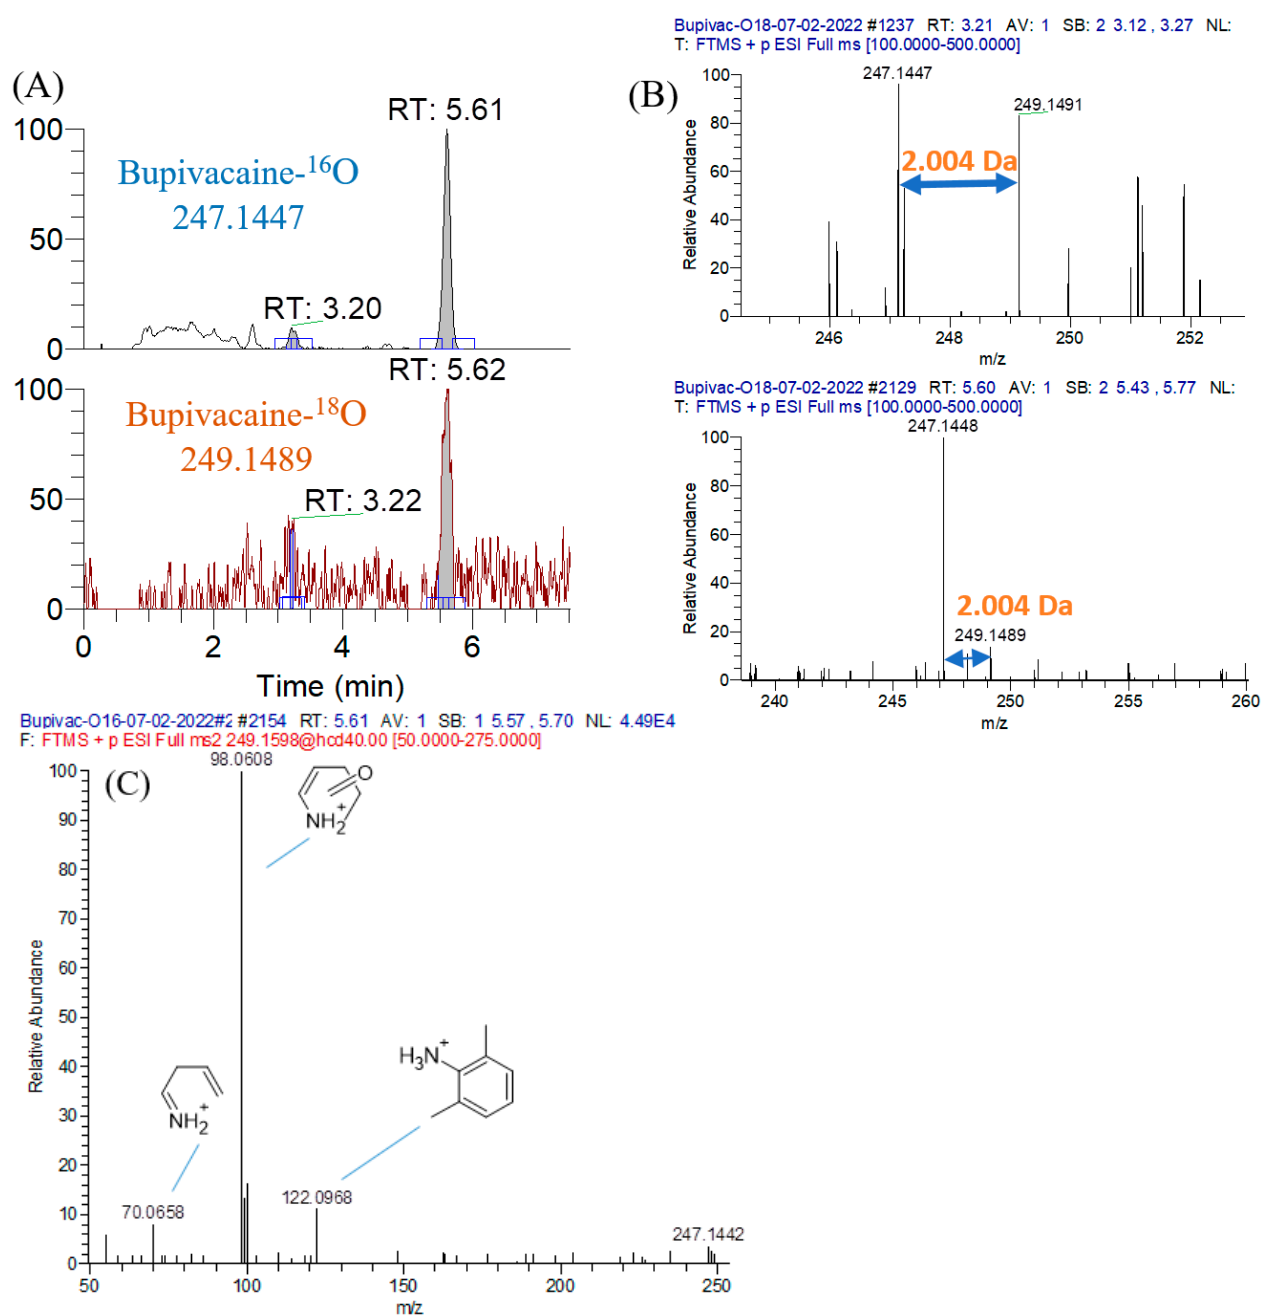

Figure S3. (A) Extracted ion chromatograms m/z 247.1441 and 249.1484 (for  $^{18}\text{O}$ -isotope labeled), (B) mass spectra of unreported bupivacaine metabolites DAO with RT 3.20 and 5.61 min in positive-ion electrospray ionization mode. (C) MS/MS spectra DAO with RT 5.61 min

Bupivac-O16-07-02-2022#2 #3360 RT: 8.83 AV: 1 SB: 2 9.13, 7.72 NL:  
F: FTMS + p ESI Full ms2 303.2067@hcd40.00 [50.0000-330.0000]

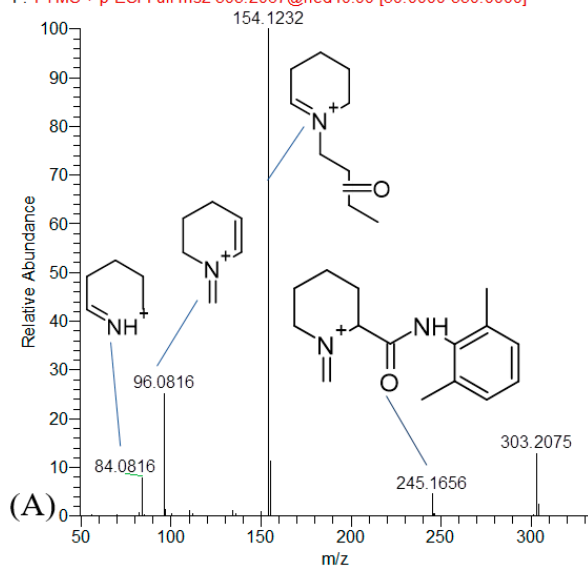

Bupivac-O16-07-02-2022#2 #1174 RT: 3.02 AV: 1 SB: 2 2.87, 3.09 NL:  
F: FTMS + p ESI Full ms2 303.2067@hcd40.00 [50.0000-330.0000]

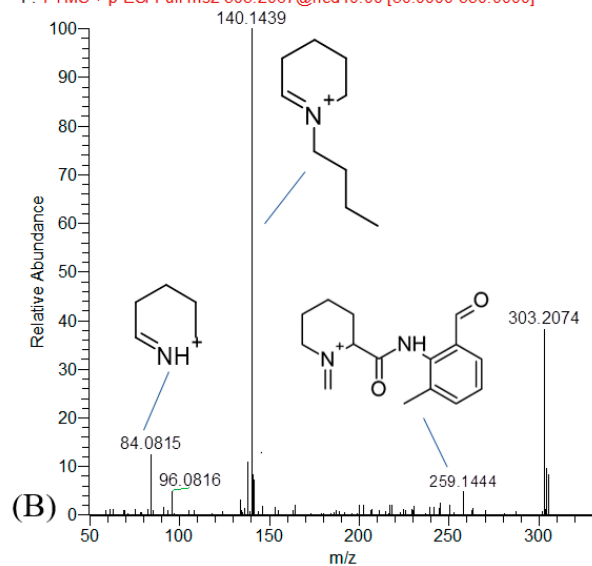

Figure S4. MS/MS spectra unreported metabolites (A) O-2 with RT 8.83 min and (B) O-3 with RT 3.00 min. The presented spectra without oxygen-18 isotope labels in positive-ion electrospray ionization mode

Bupivac-O16-07-02-2022 #1522 RT: 4.10 AV: 1 SB: 2 3.67, 3.85 NL:  
F: FTMS + p ESI Full ms2 321.2173@hcd40.00 [50.0000-345.0000]

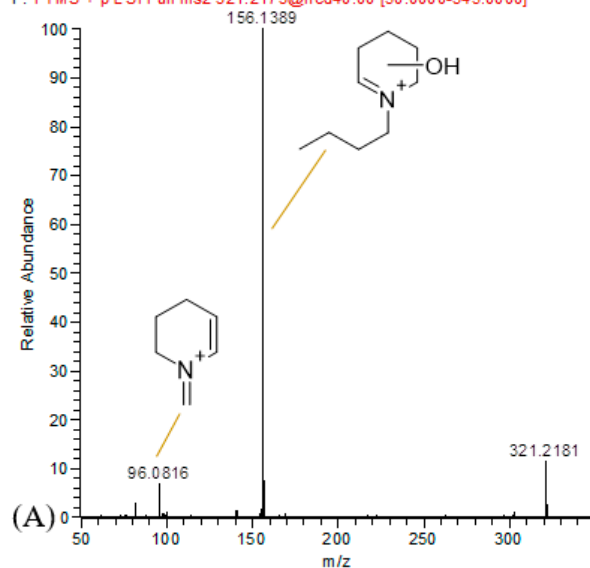

Bupivac-O18-07-02-2022 #1266 RT: 3.29 AV: 1 SB: 2 3.00, 3.58 NL:  
F: FTMS + p ESI Full ms2 321.2059@hcd40.00 [50.0000-345.0000]

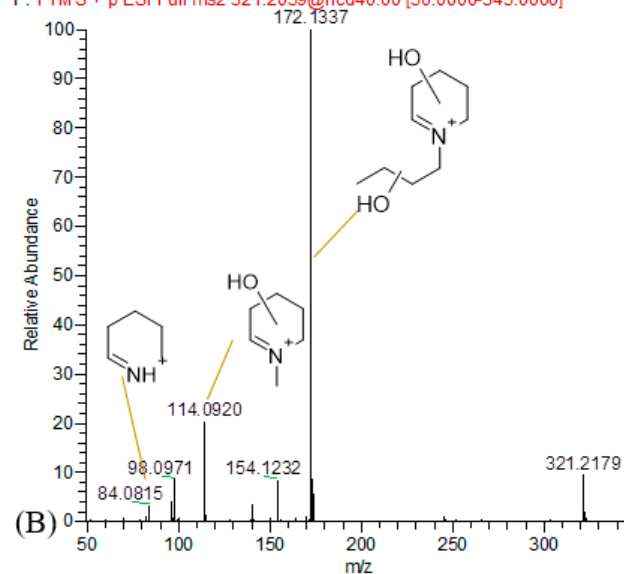

Bupivac-O16-07-02-2022 #570 RT: 1.46 AV: 1 NL: 1.31E6  
F: FTMS + p ESI Full ms2 321.2173@hcd40.00 [50.0000-345.0000]

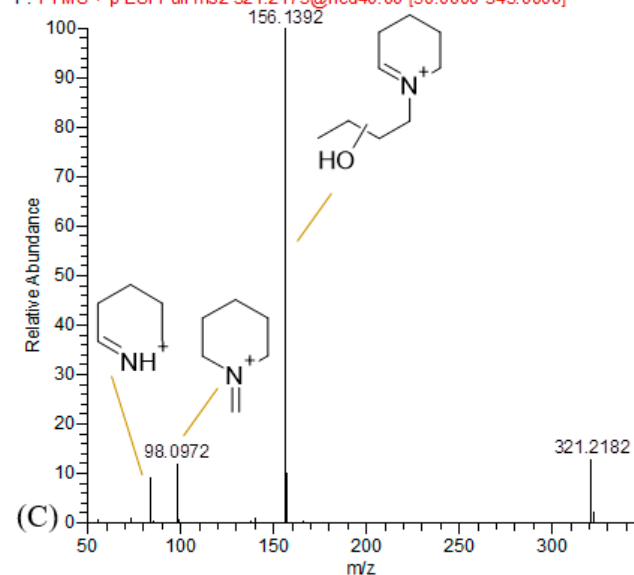

Figure S5. MS/MS spectra unreported metabolites (A) DH-1 with RT 4.10 min, (B) DH-2 with RT 3.29 min and (C) DH-3 with RT 1.45 min. The presented spectra without oxygen-18 isotope labels in positive-ion electrospray ionization mode

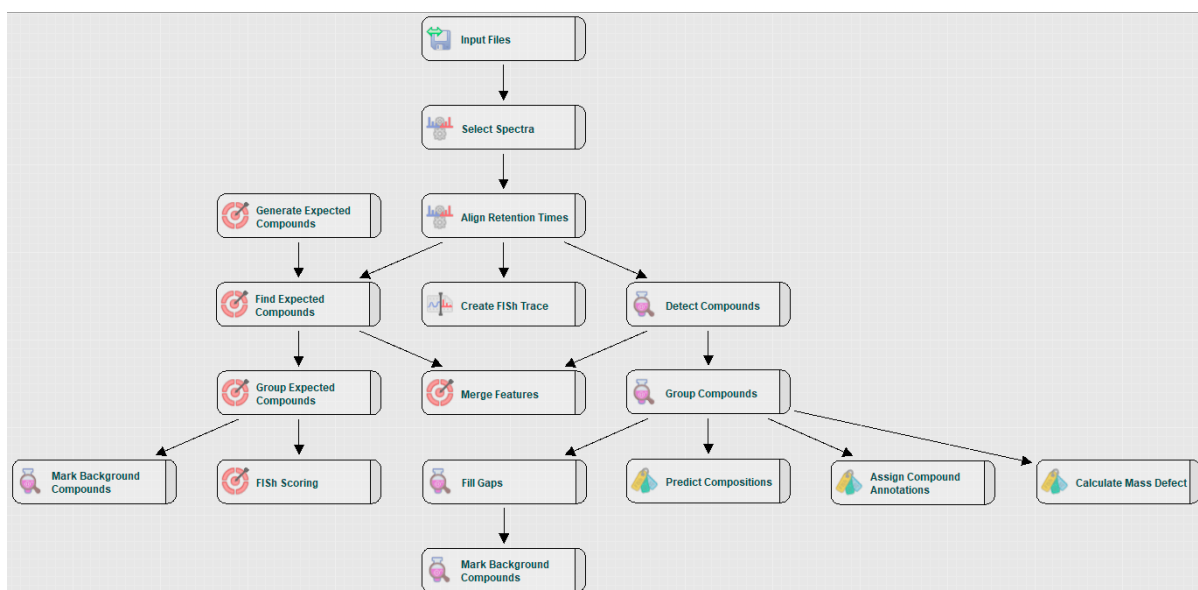

Figure S6. Compound Discoverer™ 3.2 (Thermo Fisher Scientific, Houston, Texas, USA) program workflow for bupivacaine metabolism study
